# Supplementary material for: Temperature-Responsive Magnetic Nanoparticles for Bioanalysis of Lysozyme in Urine Samples
Source: MDPI journal article supplement (doi:10.3390/nano11113015), 2021-11-10
Supplement: s1 [file s1]

# Temperature-Responsive Magnetic Nanoparticles for Bioanalysis of Lysozyme in Urine Samples

Marwa A. Ahmed <sup>1,2</sup>, Júlia Erdőssy <sup>1</sup> and Viola Horváth <sup>1,3</sup>

<sup>1</sup> Department of Inorganic and Analytical Chemistry, Faculty of Chemical Technology and Biotechnology,

Budapest University of Technology and Economics, H-1111 Budapest, Hungary;  
marwaaa@a-edu.suez.edu.eg (M.A.A.); julia.erdossy@gmail.com (J.E.)

<sup>2</sup> Department of Chemistry, Faculty of Science, Arish University, 45511 El-Arish, North Sinai, Dahyet El Salam, Egypt

<sup>3</sup> MTA-BME Computation Driven Chemistry Research Group, H-1111 Budapest, Hungary

\* Correspondence: horvath.viola@vbk.bme.hu

## Section S1. Quantitation of the surface NH<sub>2</sub>-groups

Quantitation of primary amino groups on the surface of Fe<sub>3</sub>O<sub>4</sub>@SiO<sub>2</sub>-NH<sub>2</sub> particles was carried out in order to prove the successful layer formation from APTMOS and the consecutive modification by the RAFT agent. This was carried out by the ninhydrin colorimetric assay. The reagent mixture consisted of ninhydrin solution (140 mM in ethanol + 0.2 v/v% acetic acid) and acetate buffer (100 mM, pH 5.5) in 2:1 ratio. For calibration 400 µl ninhydrin reagent was reacted with 200 µl of various known concentrations of APTMOS (0.25; 0.4; 0.58; 0.7; 0.85; 1 and 1.15 mM in acetate buffer (100 mM, pH 5.5)) to form colored products. The samples were heated to 100 °C for 15 min. After cooling to room temperature the absorbance of the solutions was measured at 570 nm [1]. The calibration curve is shown in Figure S1.

For measuring the primary amino groups on the surface of the nanoparticles we added 600 µl reaction mixture to 3 mg of nanoparticles. The samples were treated the same way as above. After separation with a magnet the absorbance of the supernatants was measured at 570 nm. The concentration of amino groups was calculated to be 147 nmol/mg.

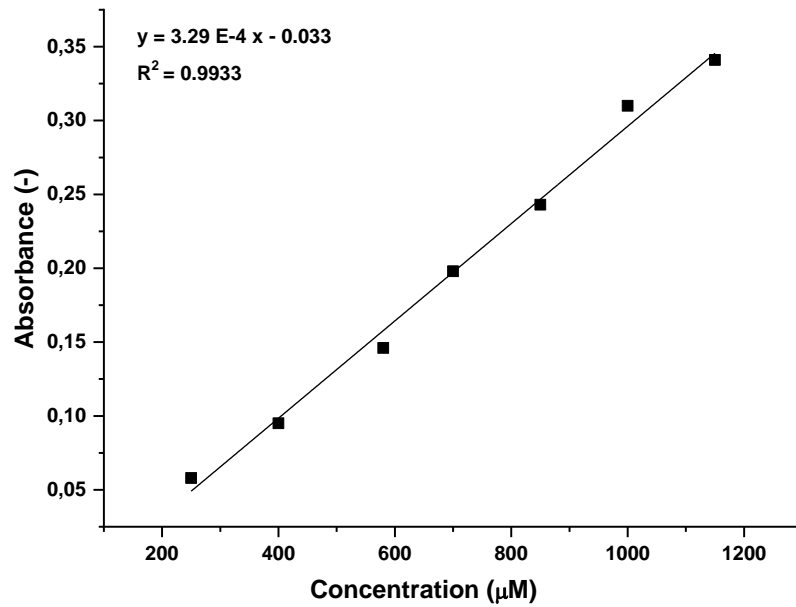

**Figure S1:** Calibration curve for APTMS using ninhydrin

## Section S2. Calculation of the polymer shell thickness

The percentage weight loss due to the polymer shell decomposition was calculated from the TG curves for Lys-PMNPs and for Lys-PMNP-TEMED particles. From the mean diameter of the  $\text{Fe}_3\text{O}_4$  core, the thickness of the silica shell, the density of  $\text{Fe}_3\text{O}_4$ ,  $\text{SiO}_2$  and the polymer, the thickness of the polymer shell could be calculated according to the following equation:

$$p = \sqrt[3]{\frac{\%}{100 - \%} \cdot \frac{d^3 \cdot \rho_{\text{Fe}_3\text{O}_4} + ((d + 2s)^3 - d^3) \cdot \rho_{\text{SiO}_2}}{\rho_{\text{polymer}}}} + (d + 2s)^3 - (d + 2s)$$

where

$d$  is the mean diameter of the  $\text{Fe}_3\text{O}_4$  nanoparticles

$s$  is the thickness of the  $\text{SiO}_2$  shell

$p$  is the thickness of the polymer shell

$\rho_{\text{Fe}_3\text{O}_4}$  is the density of  $\text{Fe}_3\text{O}_4$  (5.2 g/cm<sup>3</sup>)

$\rho_{\text{SiO}_2}$  is the density of  $\text{SiO}_2$  (2.2 g/cm<sup>3</sup>)

$\rho_{\text{polymer}}$  is the density of the polymer shell (0.5 g/cm<sup>3</sup> in the collapsed state [2])

$\%$  is the percentage weight loss of Lys-PMNP (9.0%) or Lys-PMNP-TEMED (16.8%) due to the decomposition of the polymer shell.

**Table S1:** Comparison of lysozyme-selective nanoparticles

| No. | Particle core                                                  | Polymer                                                           | Initiator                      | Selectivity achieved by     | Selectivity against albumin                     | Equilibration time (min) | Q (mg/g) | Thermocontrolled binding and release | Biological sample             | Applicability test                                                          | Reference |
|-----|----------------------------------------------------------------|-------------------------------------------------------------------|--------------------------------|-----------------------------|-------------------------------------------------|--------------------------|----------|--------------------------------------|-------------------------------|-----------------------------------------------------------------------------|-----------|
| 1   | Fe <sub>3</sub> O <sub>4</sub> /silica                         | styrene-sulfonate N-isopropyl-acrylamide                          | azobisisobutyronitrile at 60°C | special functional monomers | ≈7                                              | 45                       | 91       | yes                                  | human serum diluted 10 times  | depletion of human serum measured by HPLC, recovery from spiked serum       | [3]       |
| 2   | Fe <sub>3</sub> O <sub>4</sub> /silica                         | BIS acrylamide methacrylic acid                                   | APS, TEMED 25°C                | molecular imprinting        | ≈5.7                                            | 100                      | 110      | no                                   | human serum diluted 200 times | recovery from spiked human serum, measured by chemiluminescence measurement | [4]       |
| 3   | Fe <sub>3</sub> O <sub>4</sub> /silica                         | BIS acrylamide methacrylic acid                                   | APS, TEMED 25°C                | molecular imprinting        | ≈5.7                                            | 5                        | 110      | no                                   | human urine diluted 200 times | method validation                                                           | [5]       |
| 4   | Fe <sub>3</sub> O <sub>4</sub> /silica                         | 1-(α-allylacetate)-3-N-(3-aminopropyl)-imidazolium chloride BIS   | APS, TEMED 25°C                | molecular imprinting        | ≈11                                             | 150                      | 217      | no                                   | chicken egg white             | depletion of chicken egg white measured by SDS PAGE                         | [6]       |
| 5   | Fe <sub>3</sub> O <sub>4</sub> /polyacrylic acid/chitosan-COOH | BIS acrylamide methacrylic acid (dimethylamino)ethyl methacrylate | APS, TEMED 25°C                | molecular imprinting        | no interference at the same concentration level | 180                      | 120      | no                                   | no                            | no                                                                          | [7]       |
| 6   | silica                                                         | BIS acrylamide methacrylic acid (dimethylamino)ethyl methacrylate | APS, TEMED 25°C                | molecular imprinting        | no interference at the same concentration level | 5                        | 10       | no                                   | no                            | no                                                                          | [8]       |
| 7   | chitosan wrapped carboxylated MWCNT                            | dopamine                                                          | -                              | molecular imprinting        | ≈21                                             | 40                       | 400      | no                                   | egg white                     | depletion of chicken egg white measured by SDS PAGE                         | [9]       |

|    |                                                         |                                                             |                        |                             |                                                             |     |     |     |                                                           |                                                                       |           |
|----|---------------------------------------------------------|-------------------------------------------------------------|------------------------|-----------------------------|-------------------------------------------------------------|-----|-----|-----|-----------------------------------------------------------|-----------------------------------------------------------------------|-----------|
| 8  | Fe <sub>3</sub> O <sub>4</sub> /polymethyl methacrylate | dihydroxy-phenylacetic acid                                 | -                      | molecular imprinting        | ≈13                                                         | 120 | 125 | no  | no                                                        | no                                                                    | [10]      |
| 9  | Fe <sub>3</sub> O <sub>4</sub> /silica                  | acrylamide methacrylic acid tetraethoxysilane               | azobisisobutyronitrile | molecular imprinting        | ≈6                                                          | 60  | 100 | no  | human urine                                               | recovery from spiked urine                                            | [11]      |
| 10 | Fe <sub>3</sub> O <sub>4</sub>                          | dopamine                                                    | self-polymerization    | molecular imprinting        | ≈6                                                          | 720 | 220 | no  | no                                                        | no                                                                    | [12]      |
| 11 | Fe <sub>3</sub> O <sub>4</sub> /silica                  | 2-(2-methoxyethoxy) ethyl methacrylate BIS methacrylic acid | APS, TEMED 25°C        | molecular imprinting        | ≈28                                                         | 120 | 204 | yes | reconstituted dry human urine diluted approx. 40-90 times | depletion of human urine measured by HPLC, recovery from spiked urine | [13]      |
| 12 | silica                                                  | BIS methacrylic acid                                        | APS, TEMED 25°C        | molecular imprinting        | ≈6.5                                                        | 200 | 25  | no  | human serum diluted 50 times                              | depletion of human serum, measured by SDS PAGE                        | [14]      |
| 13 | Fe <sub>3</sub> O <sub>4</sub> /silica                  | BIS NIPAm TBAm Aac                                          | APS, SBS/TEMED 25°C    | special functional monomers | no interference at four times excess of human serum albumin | 5   | 34  | yes | human urine diluted 10 times                              | method validation                                                     | this work |

**Video S1:** Title video-1-Fe<sub>3</sub>O<sub>4</sub>-LysPMNP.mp4

**Video S2:** Title video-2-Lys-PMNP-Lys-PMNP-TEMED.mp4

## References

- [1] Nagy, F.; Tasnádi, G.; Balogh-Weiser, D.; Bell, E.; Hall, M.; Faber, K.; Poppe, L. Smart Nanoparticles for Selective Immobilization of Acid Phosphatases. *ChemCatChem* 2018, 10, 3490–3499, <https://doi.org/10.1002/cctc.201800405>
- [2] Tokuhito, T. Temperature Dependence of Density of Polymer Gels 1. A Pycnometry Method Applied to Poly(N-isopropylacrylamide)–Water System. *J. Phys. Chem. B* 1999, 103, 7097–7101, <https://doi.org/10.1021/jp9843510>.
- [3] Zhang, M.; Qiao, J.; Qi, L. Dual-functional polymer-modified magnetic nanoparticles for isolation of lysozyme. *Anal. Chim. Acta* 2018, 1035, 70–76, <https://doi.org/10.1016/j.aca.2018.07.019>.
- [4] Jing, T.; Du, H.; Dai, Q.; Xia, H.; Niu, J.; Hao, Q.; Mei, S.; Zhou, Y. Magnetic molecularly imprinted nanoparticles for recognition of lysozyme. *Biosens. Bioelectron.* 2010, 26, 301–306, <https://doi.org/10.1016/j.bios.2010.08.044>.
- [5] Jing, T.; Xia, H.; Guan, Q.; Lu, W.; Dai, Q.; Niu, J.; Lim, J.-M.; Hao, Q.; Lee, Y.-I.; Zhou, Y.; et al. Rapid and selective determination of urinary lysozyme based on magnetic molecularly imprinted polymers extraction followed by chemiluminescence detection. *Anal. Chim. Acta* 2011, 692, 73–79, <https://doi.org/10.1016/j.aca.2011.02.057>.
- [6] Xu, W.; Dai, Q.; Wang, Y.; Hu, X.; Xu, P.; Ni, R.; Meng, J. Creating magnetic ionic liquid-molecularly imprinted polymers for selective extraction of lysozyme. *RSC Adv.* 2018, 8, 21850–21856, <https://doi.org/10.1039/c8ra03818j>.
- [7] Guo, H.; Yuan, D.; Fu, G. Enhanced surface imprinting of lysozyme over a new kind of magnetic chitosan submicrospheres. *J. Colloid Interface Sci.* 2015, 440, 53–59, <https://doi.org/10.1016/j.jcis.2014.10.059>.
- [8] He, H.; Fu, G.; Wang, Y.; Chai, Z.; Jiang, Y.; Chen, Z. Imprinting of protein over silica nanoparticles via surface graft copolymerization using low monomer concentration. *Biosens. Bioelectron.* 2010, 26, 760–765, <https://doi.org/10.1016/j.bios.2010.06.043>.
- [9] Xu, X.; Guo, P.; Luo, Z.; Ge, Y.; Zhou, Y.; Chang, R.; Du, W.; Chang, C.; Fu, Q. Preparation and characterization of surface molecularly imprinted films coated on multiwall carbon nanotubes for recognition and separation of lysozyme with high binding capacity and selectivity. *RSC Adv.* 2017, 7, 18765–18774, <https://doi.org/10.1039/c6ra28063c>.
- [10] Lan, F.; Ma, S.; Ma, J.; Yang, Q.; Yi, Q.; Wu, Y.; Gu, Z. Superparamagnetic nanocomposites based on surface imprinting for biomacromolecular recognition. *Mater. Sci. Eng. C* 2017, 70, 1076–1080, <https://doi.org/10.1016/j.msec.2016.03.048>.
- [11] Zhang, Z.; Wang, H.; Wang, H.; Wu, C.; Li, M.; Li, L. Fabrication and evaluation of molecularly imprinted magnetic nanoparticles for selective recognition and magnetic separation of lysozyme in human urine. *Analyst* 2018, 143, 5849–5856, <https://doi.org/10.1039/c8an01746h>.
- [12] Zhang, M.; Zhang, X.; He, X.; Chen, L.; Zhang, Y. A self-assembled polydopamine film on the surface of magnetic nanoparticles for specific capture of protein. *Nanoscale* 2012, 4, 3141–3147, <https://doi.org/10.1039/c2nr30316g>.
- [13] Li, N.; Qi, L.; Shen, Y.; Qiao, J.; Chen, Y. Novel Oligo(ethylene glycol)-Based Molecularly Imprinted Magnetic Nanoparticles for Thermally Modulated Capture and Release of Lysozyme. *ACS Appl. Mater. Interfaces* 2014, 6, 17289–17295, <https://doi.org/10.1021/am505427j>.

[14] Lin, Z.; Xia, Z.; Zheng, J.; Zheng, D.; Zhang, L.; Yang, H.; Chen, G. Synthesis of uniformly sized molecularly imprinted polymer-coated silica nanoparticles for selective recognition and enrichment of lysozyme. *J. Mater. Chem.* 2012, 22, 17914–17922, <https://doi.org/10.1039/c2jm32734a>.
